# Supplementary material for: Preparation and Characterization of Nickel Ferrite-SiO2/Ag Core/Shell Nanocomposites
Source: Hindawi journal article supplement (doi:10.1155/2015/678739), 2015-01-01
Supplement: f1 [file 678739.f1.docx]

**Electronic Supplementary Information**

**Preparation and characterization of nickel ferrite-SiO2/Ag core/shell nanocomposites**

I.G. Blanco-Esqueda1, G. Ortega-Zarzosa1, J.R. Martínez1, 2, A.L. Guerrero*3

**1**Facultad de Ciencias, Universidad Autónoma de San Luis Potosí. Álvaro Obregón No. 64, Col. Centro, San Luis Potosí, S.L.P., 78000 México.

**2**Departamento de Físico-Matemáticas, Universidad Autónoma de San Luis Potosí. Álvaro Obregón No. 64, Col. Centro, San Luis Potosí, S.L.P., 78000 México.

**3**Instituto de Física, Universidad Autónoma de San Luis Potosí, Álvaro Obregón No. 64, Col. Centro, San Luis Potosí, S.L.P., 78000 México.

*Corresponding Author: [azdlobo@gmail.com](mailto:azdlobo@gmail.com)

I. Supplementary Figures:


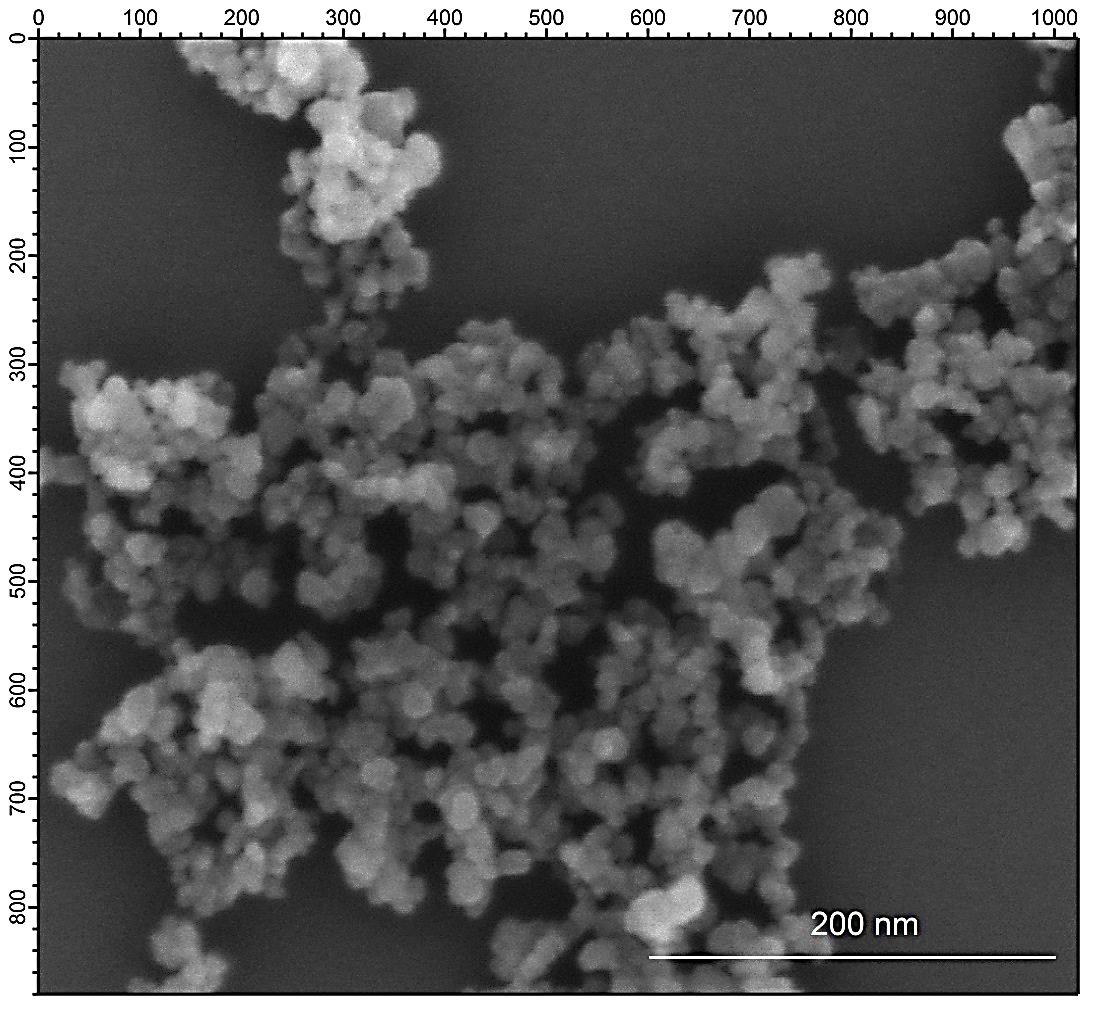


**S1**. The SEM micrograph shows the nickel ferrite nanoparticles with a cover of SiO2.


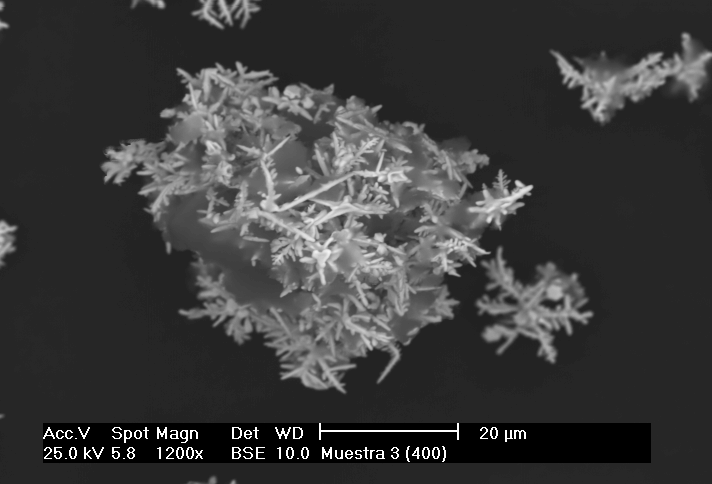


**S2**. The SEM micrograph shows the Ag nanoparticles growing in a dendritic way on the SiO2 surface.
